# Supplementary material for: Annual plankton community metabolism in estuarine and coastal waters in Perth (Western Australia)
Source: PeerJ. 2018 Jun 26;6:e5081. doi: 10.7717/peerj.5081 (PMC6025146; doi:10.7717/peerj.5081)
Supplement: Data S1 — Sampling locations names, dates and values and units of the different parameters measured along the study. [file peerj-06-5081-s001.xlsx]

## Sheet: Sheet1
Station	Date	Temperature oC	Salinidad EXO I	R (µmolO2/L/day)	NCP (µmolO2/L/day)	GPP (µmolO2/L/day)	Ammonia (N-NH3) (µg L-1)	Nitrate (N-NOx) (µg L-1)	Phosphate (P-PO4 (µg L-1)	Chlorophyll a (µg L-1)
Matilda Bay	2014-03-05	24.6		10.0853	12.2687	22.354
Matilda Bay	2014-03-12	24.6	36.9696	10.0098	-0.680194	9.32957
Matilda Bay	2014-03-18	22.6		4.51083	4.9335	9.44433				1.89961
Matilda Bay	2014-03-25	23.6	36.9358	10.5024	7.81803	18.3204				3.25633
Matilda Bay	2014-04-02	21.4	36.5726	5.92988	8.49642	14.4263				3.6922
Matilda Bay	2014-04-08	21.1	36.4625	5.11319	5.16773	10.2809				2.44598
Matilda Bay	2014-04-15	23.5	35.8444	6.25087	6.28496	12.5358				3.90093
Matilda Bay	2014-04-23	20.7	36.9698	3.43302	3.79373	7.22675	18.808	2.328	13.315	3.15811
Matilda Bay	2014-04-29	19.7	36.8659	4.3228	8.03693	12.3597				2.88185
Matilda Bay	2014-05-08	19.1	36.4796	5.63952	5.79548	11.435	18.36	2.806	13.118	5.65054
Matilda Bay	2014-05-22	20	34.5979	8.37052	0.780019	9.15054	22.91	4.074	12.215	3.52645
Matilda Bay	2014-06-05	18.6	32.096	8.37891	10.1906	18.5695	18.259	2.979	8.869	4.49027
Matilda Bay	2014-06-19	16	31.1792	4.56269	1.78649	6.34918	57.428	14.357	13.858	2.43984
Matilda Bay	2014-07-03	14.3	28.0684	5.86161	13.2516	19.1132	44.174	92.836	10.254	5.63212
Matilda Bay	2014-07-17	12	23.1916	12.1683	31.8358	44.0041	34.561	166.485	9.695	14.3925
Matilda Bay	2014-07-30	16.1		8.46476	-2.25285	6.21191	68.17	141.969	8.665	3.55714
Matilda Bay	2014-08-14	16.7	25.9864	6.28645	11.463	17.7495	67.923	95.125	14.15	5.05506
Matilda Bay	2014-08-29	18.7	25.1562	9.91421	9.72371	19.6379	24.864	5.682	7.426	6.20305
Matilda Bay	2014-09-11	16.3	22.1397	9.12737	24.9884	34.1158	96.062	110	12.398	8.47448
Matilda Bay	2014-09-25	17.3	22.0281	12.3203	11.8949	24.2152	45.112	13.287	12.47	7.86672
Matilda Bay	2014-10-07	17.4		5.60915	-0.132565	5.47659	40.899	6.959	7.005	1.83822
Matilda Bay	2014-10-20	18.5	25.0624	5.94057	1.92009	8.69491	26.672	6.493	9.45	2.28637
Matilda Bay	2014-11-11	22.5								6.34
Matilda Bay	2014-11-19	23.1	29.3581	11.918	-1.19821	10.7198	56.952	11.039	15.72	1.28571
Matilda Bay	2014-12-02	25.5	30.634	26.974	8.24366	35.2176	22.814	4.759	12.239	4.06668
Matilda Bay	2014-12-12	20.6	30.5323	7.41231	6.37154	13.7838	32.325	8.166	14.639	2.20042
Matilda Bay	2014-12-22	23	32.4199	7.20839	5.27577	12.4842	25.523	3.962	19.747	1.4883
Matilda Bay	2015-01-07	25	34.3542	9.911	4.81851	14.7295	18.462	5.57	16.472	2.23726
Matilda Bay	2015-01-20	27.4	35.2479	14.3811	-3.25039	11.1308	62.75	15.497	24.452	1.56197
Matilda Bay	2015-02-05	25.5	35.8037	8.6467	16.0453	24.692	14.838	3.521	17.311	3.15197
Matilda Bay	2015-02-16	24	35.8428	10.926	7.571	18.497	27.425	14.62	34.747	4.46571
Matilda Bay	2015-03-03	25.3	35.7133	11.4442	3.19731	14.6415	34.445	31.224	38.563	3.08444
Matilda Bay	2015-03-16	25.1	35.987	10.3403	6.3963	16.7366	21.055	15.772	38.947	3.15811
Woodman Point	2014-03-11	23		5.42475
Woodman Point	2014-03-17	22.2		3.74316	4.84393	8.58709
Woodman Point	2014-03-31	21.6		2.39327	2.25891	4.65219				1.10768
Woodman Point	2014-04-17	23.4	34.5144	2.73556	1.38908	4.12464				0.733202
Woodman Point	2014-05-01	20	35.9416	3.31801	2.96413	6.28214				1.93645
Woodman Point	2014-05-16	20	35.2281	2.44296	6.41795	8.86092	27.345	7.508	7.79	2.3232
Woodman Point	2014-05-30	19	34.3851	2.03811	0.5284	2.56651	27.171	6.094	9.073	1.77069
Woodman Point	2014-06-11	18.3	34.7042	1.3839	1.89553	3.27943	29.404	16.038	7.593	1.61722
Woodman Point	2014-06-26	17.3	35.3285	4.4256	-1.62916	2.79644	22.452	10.525	6.803	1.86278
Woodman Point	2014-07-10	15.1	34.0411	0.789386	4.31643	5.10582	23.731	17.99	9.157	1.53741
Woodman Point	2014-07-23	15.9		2.29258	3.74539	6.03796	17.288	9.713	7.412	1.55583
Woodman Point	2014-08-06	15.3	33.6423	2.62557	7.64479	10.2704	20.093	3.935	0.983	3.39753
Woodman Point	2014-08-22	18.6	33.853	1.57368	2.8492	4.42288	24.643	4.127	10.316	1.64791
Woodman Point	2014-09-05	18.1	34.4576	3.71215	0.697958	4.41011	23.064	4.815	9.625	1.52513
Woodman Point	2014-09-18	18	31.6226	1.30079	3.98523	5.28603	19.22	5.242	6.596	1.17521
Woodman Point	2014-10-01	20.6	34.6063	1.67363	2.76729	4.44092	26.631	4.43	9.954	1.68475
Woodman Point	2014-10-15	21.7	34.8501	5.94057	-0.987332	4.95323	18.953	3.641	8.175	0.80687
Woodman Point	2014-11-18	21.6		9.83886	-1.76357	8.07529	65.455	4.995	7.528
Woodman Point	2014-12-01	21.9	35.0226	6.52215	1.47231	7.99446	15.993	4.414	9.691	1.36552
Woodman Point	2014-12-17	21.2	36.3007	5.48167	-2.12526	3.35641	18.45	4.693	5.829
Woodman Point	2015-01-06	24.6	36.7918	7.78385	-5.34518	2.43867	44.405	12.5	0.867	0.598144
Woodman Point	2015-01-13	24	36.9151				62.849	5.101	0.053	1.89961
Woodman Point	2015-01-27	24.7	37.1241	3.78869	0.753032	4.54172	88.814	18.018	6.494	0.604283
Woodman Point	2015-02-09	25	36.8797	9.36667	2.93565	12.3023	15.271	3.824	2.211	2.40301
Woodman Point	2015-02-23	23.7	36.555	6.04235	2.83999	8.88234	40.971	17.235	4.496	1.84436
Woodman Point	2015-03-10	24.4	36.4709	5.45076	3.09112	8.54188	22.237	4.986	2.465	0.739341
Woodman Point	2015-03-24	22	36.5554	5.95808	7.53398	13.4921	13.92	2.876	1.551	2.06536
